# Supplementary material for: Beta-Blocker Separation on Phosphodiester Stationary Phases—The Application of Intelligent Peak Deconvolution Analysis
Source: MDPI journal article supplement (doi:10.3390/molecules28073249), 2023-04-05
Supplement: s1 [file s1]

**Table S1 Retention factors of beta-blockers on tested phosphodiester stationary phases.**

| Diol-P-Benzyl |            |             |            |             |          |            |            |          |
|---------------|------------|-------------|------------|-------------|----------|------------|------------|----------|
| ACN           | metoprolol | propranolol | mexiletine | cicloprolol | atenolol | acebutolol | oxprenolol | pindolol |
| 10%           | 14.68      | 13.87       | 8.37       | 16.99       | 10.05    | 15.60      | 13.38      | 8.98     |
| 20%           | 8.03       | 7.66        | 5.32       | 7.46        | 6.44     | 8.00       | 7.32       | 6.18     |
| 30%           | 6.25       | 5.62        | 4.80       | 5.80        | 6.02     | 6.20       | 5.50       | 5.05     |
| 70%           | 5.10       | 3.62        | 3.60       | 3.96        | 9.15     | 5.62       | 3.85       | 4.02     |
| 80%           | 7.12       | 5.24        | 4.95       | 6.07        | 16.67    | 8.83       | 5.75       | 5.96     |
| 90%           | 23.88      | 17.71       | 11.76      | 21.14       | 56.73    | 31.34      | 18.77      | 19.04    |
| Diol-P-C18    |            |             |            |             |          |            |            |          |
| ACN           | metoprolol | propranolol | mexiletine | cicloprolol | atenolol | acebutolol | oxprenolol | pindolol |
| 10%           | 18.96      | 20.94       | 11.43      | 16.90       | 8.24     | 26.08      | 21.89      | 11.00    |
| 20%           | 9.71       | 10.05       | 7.84       | 9.07        | 5.35     | 10.42      | 11.22      | 7.12     |
| 30%           | 6.76       | 5.47        | 5.99       | 5.84        | 4.57     | 6.71       | 7.45       | 5.51     |
| 70%           | 4.79       | 4.13        | 3.72       | 5.10        | 6.71     | 5.13       | 4.49       | 3.90     |
| 80%           | 6.80       | 5.44        | 4.86       | 5.69        | 11.89    | 7.64       | 5.55       | 5.51     |
| 90%           | 19.65      | 15.65       | 11.35      | 17.76       | 42.33    | 25.52      | 19.72      | 16.16    |
| Diol-P-C10    |            |             |            |             |          |            |            |          |
| ACN           | metoprolol | propranolol | mexiletine | cicloprolol | atenolol | acebutolol | oxprenolol | pindolol |
| 10%           | 7.28       | 9.98        | 4.39       | 9.57        | 4.44     | 9.34       | 6.94       | 5.00     |
| 20%           | 5.04       | 7.03        | 3.87       | 6.02        | 3.43     | 5.62       | 4.48       | 4.02     |
| 30%           | 4.07       | 5.17        | 3.44       | 4.60        | 3.05     | 4.25       | 4.20       | 3.51     |
| 70%           | 3.81       | 3.25        | 2.97       | 3.33        | 5.41     | 4.16       | 2.79       | 3.17     |
| 80%           | 4.81       | 4.62        | 4.07       | 4.18        | 9.08     | 6.33       | 4.09       | 4.17     |
| 90%           | 14.75      | 13.90       | 9.88       | 15.70       | 36.54    | 22.08      | 17.37      | 14.48    |
| Diol-P-Chol   |            |             |            |             |          |            |            |          |
| ACN           | metoprolol | propranolol | mexiletine | cicloprolol | atenolol | acebutolol | oxprenolol | pindolol |
| 10%           | 25.14      | 47.09       | 14.14      | 25.26       | 12.64    | 39.09      | 26.63      | 11.59    |
| 20%           | 12.89      | 22.38       | 9.56       | 13.40       | 8.38     | 15.45      | 13.74      | 7.82     |
| 30%           | 8.88       | 12.73       | 7.14       | 8.19        | 6.36     | 9.47       | 9.10       | 5.90     |
| 70%           | 5.65       | 4.85        | 4.30       | 4.24        | 8.49     | 6.25       | 4.67       | 4.56     |
| 80%           | 7.12       | 6.34        | 5.36       | 6.88        | 12.78    | 9.31       | 7.91       | 5.75     |
| 90%           | 21.87      | 19.59       | 13.71      | 22.94       | 49.06    | 32.66      | 25.25      | 18.23    |
